# Supplementary material for: Anti-obesity effects of heat-transformed green tea extract through the activation of adipose tissue thermogenesis
Source: PubMed Central journal article supplement (PMC8896087; doi:10.1186/s12986-022-00648-6), 2022-03-03
Supplement: 12986_2022_648_MOESM1_ESM.pdf [file 12986_2022_648_MOESM1_ESM.pdf]

**Supplementary Table 1. Antibodies used for immunoblot analysis**

| <b>Antibody</b> | <b>Host</b> | <b>Company</b>                    | <b>Catalog #</b> | <b>Dilution</b> |
|-----------------|-------------|-----------------------------------|------------------|-----------------|
| HSL             | Rabbit      | Cell Signaling                    | 4107             | 1:1000          |
| Phospho-HSL     | Rabbit      | Cell Signaling                    | 45804            | 1:1000          |
| UCP1            | Rabbit      | Alpha Diagnostic<br>International | UCP11-A          | 1:1000          |
| COX IV          | Rabbit      | Cell Signaling                    | 4850             | 1:1000          |
| MCAD            | Mouse       | Santa Cruz                        | sc-365030        | 1:1000          |
| Tubulin         | Rabbit      | Cell Signaling                    | 2148             | 1:1000          |

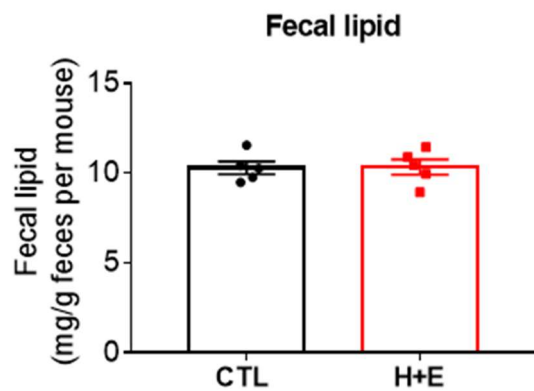

**Supplementary Figure 1. Effects of co-treatment of HTGT and EMIQ on fecal lipid content**

Lipid content in feces of HFD-fed mice treated with vehicle (CTL) or combination of HTGT and EMIQ (H+E, 100 mg/kg each) (n = 6)
